# Supplementary material
Source: MDPI journal article supplement (doi:10.3390/agriculture16111246)
Supplement: s1 [file agriculture-4330942-supplementary.pdf › agriculture-4330942-supplementary.pdf]

# Effect of *In Ovo* Injection Time Of Various Plant Byproducts on Hatching Traits, Productive Performance and Physiological Aspects Of Hatched Chicks

Karrar Imad Abdulsahib Al-Shammari, Meaad Rasool Mohammad and Justyna Batkowska

**Table S1.** Weights, lengths and pH of digestive organs sections of chicks affected by *in ovo* injection time of various plant byproducts.

| IOS×IOT                                | Proventriculus |         |      | Small intestine |          |        | Large intestine |          |         | Total gut |           |
|----------------------------------------|----------------|---------|------|-----------------|----------|--------|-----------------|----------|---------|-----------|-----------|
|                                        | W (g)          | L (cm)  | pH   | W (g)           | L (cm)   | pH     | W (g)           | L (cm)   | pH      | W (g)     | L (cm)    |
| NC×10                                  | 1.53           | 1.60 ab | 3.30 | 9.46 a          | 90.50 b  | 5.10 a | 0.92            | 17.50 d  | 6.20 ab | 22.06 ab  | 119.70 d  |
| PC×10                                  | 1.42           | 1.60 ab | 3.25 | 8.86 b          | 93.05 ab | 5.05 a | 1.75            | 21.00 a  | 6.20 ab | 23.54 ab  | 125.35 ab |
| SP×10                                  | 1.16           | 1.40 ab | 3.40 | 8.58 b          | 97.25 a  | 4.30 b | 1.16            | 18.75 cd | 5.80 b  | 21.52 ab  | 126.60 a  |
| PP×10                                  | 0.79           | 1.50 ab | 3.50 | 8.80 b          | 93.00 ab | 4.95 b | 1.21            | 18.50 cd | 6.65 a  | 21.11 ab  | 123.25 c  |
| OL×10                                  | 1.00           | 1.30 b  | 3.35 | 9.74 a          | 94.75 ab | 4.85 b | 0.92            | 19.25 bc | 6.35 ab | 22.35 ab  | 124.25 bc |
| NC×18                                  | 0.97           | 1.90 a  | 3.10 | 8.15 b          | 94.50 ab | 4.40 b | 0.98            | 20.50 a  | 6.50 ab | 20.65 ab  | 127.40 a  |
| PC×18                                  | 1.37           | 1.45 ab | 3.30 | 8.60 b          | 93.50 ab | 4.75 b | 1.31            | 19.25 bc | 6.35 ab | 22.12 ab  | 123.65 c  |
| SP×18                                  | 1.23           | 1.55 ab | 3.25 | 9.09 ab         | 94.00 ab | 4.30 b | 1.53            | 20.25 ab | 6.45 ab | 22.37 ab  | 124.95 bc |
| PP×18                                  | 1.45           | 1.60 ab | 3.25 | 10.36 a         | 93.50 ab | 4.85 b | 1.45            | 22.00 a  | 6.40 ab | 24.61 a   | 126.45 a  |
| OL×18                                  | 0.96           | 1.35 b  | 3.30 | 8.51 b          | 93.00 ab | 4.75 b | 1.34            | 20.50 a  | 6.35 ab | 20.31 b   | 124.85bc  |
| <i>In ovo</i> injected substance (IOS) |                |         |      |                 |          |        |                 |          |         |           |           |
| NC                                     | 1.25           | 1.75 a  | 3.20 | 8.80            | 92.50    | 4.75   | 0.95            | 19.00    | 6.35    | 21.30 b   | 123.55 b  |
| PC                                     | 1.40           | 1.52 ab | 3.27 | 8.73            | 93.27    | 4.90   | 1.53            | 20.12    | 6.27    | 22.83 a   | 124.50 ab |
| SP                                     | 1.19           | 1.47 ab | 3.32 | 8.83            | 95.62    | 4.30   | 1.34            | 19.50    | 6.12    | 21.94 ab  | 125.77 a  |
| PP                                     | 1.12           | 1.55 ab | 3.37 | 9.58            | 93.25    | 4.90   | 1.33            | 20.25    | 6.52    | 22.86 a   | 124.85 ab |
| OL                                     | 0.98           | 1.32 b  | 3.34 | 9.12            | 93.87    | 4.80   | 1.13            | 19.87    | 6.35    | 21.33 b   | 124.55 ab |
| <i>In ovo</i> injection time (IOT)     |                |         |      |                 |          |        |                 |          |         |           |           |
| 10 days                                | 1.18           | 1.48    | 3.36 | 9.09            | 93.71    | 4.85   | 1.19            | 19.00    | 6.24    | 22.11     | 123.83 b  |

|            |       |       |       |       |       |       |       |       |       |       |          |
|------------|-------|-------|-------|-------|-------|-------|-------|-------|-------|-------|----------|
| 18 days    | 1.19  | 1.57  | 3.24  | 8.94  | 93.70 | 4.61  | 1.32  | 20.50 | 6.41  | 22.01 | 125.46 a |
| Pooled SEM | 0.169 | 0.10  | 0.12  | 0.47  | 1.07  | 0.23  | 0.19  | 0.97  | 0.14  | 0.91  | 1.70     |
| p-value    |       |       |       |       |       |       |       |       |       |       |          |
| IOS        | 0.074 | 0.025 | 0.108 | 0.092 | 0.080 | 0.107 | 0.477 | 0.101 | 0.143 | 0.040 | 0.023    |
| IOT        | 0.173 | 0.095 | 0.272 | 0.271 | 0.671 | 0.375 | 0.095 | 0.099 | 0.989 | 0.675 | 0.044    |
| IOS×IOT    | 0.099 | 0.041 | 0.093 | 0.031 | 0.025 | 0.042 | 0.108 | 0.038 | 0.030 | 0.047 | 0.036    |

NC, PC, SP, PP, and OL - negative control, positive control, and *in ovo* injection of sweet orange peel, pomegranate peel, and olive leaf, respectively, on day 10 (×10) and day 18 (×18) of incubation; W – weight, L - length; SEM - standard error of the mean; a, b, c, d - means within a column with different letters differ significantly ( $p \leq 0.05$ ).

**Table S2.** Visceral organs weights of chicks affected by *in ovo* injection time of various plant byproducts.

| IOS×IOT                                | Adrenal gland (g) | Pancreas (g) | Lungs (g) | Kidneys (g) | Liver (g) | Heart (g) | Yolk sac (g) | Thymus gland (g) | Spleen (g) | Bursa of Fabricius |
|----------------------------------------|-------------------|--------------|-----------|-------------|-----------|-----------|--------------|------------------|------------|--------------------|
| NC×10                                  | 0.04              | 0.14 b       | 0.11 b    | 0.36 ab     | 2.62 b    | 0.85 ab   | 0.14         | 0.12 b           | 0.11       | 0.10 b             |
| PC×10                                  | 0.02              | 0.24 b       | 0.41 ab   | 0.27 b      | 3.05 ab   | 0.95 ab   | 0.43         | 0.19 ab          | 0.11       | 0.20 ab            |
| SP×10                                  | 0.05              | 0.22 b       | 0.76 a    | 0.61 a      | 2.53 b    | 0.54 b    | 0.26         | 0.30 a           | 0.06       | 0.19 ab            |
| PP×10                                  | 0.04              | 0.35 ab      | 0.58 ab   | 0.46 ab     | 2.60 b    | 0.87 ab   | 0.23         | 0.19 ab          | 0.09       | 0.19 ab            |
| OL×10                                  | 0.05              | 0.16 b       | 0.57 ab   | 0.51 ab     | 2.90 b    | 0.96 ab   | 0.26         | 0.21 ab          | 0.09       | 0.21 ab            |
| NC×18                                  | 0.04              | 0.57 a       | 0.12 b    | 0.42 ab     | 2.36 b    | 0.75 ab   | 0.19         | 0.13 b           | 0.10       | 0.10 b             |
| PC×18                                  | 0.07              | 0.30 ab      | 0.52 ab   | 0.36 ab     | 3.67 ab   | 0.64 b    | 0.18         | 0.18 ab          | 0.12       | 0.29 a             |
| SP×18                                  | 0.07              | 0.41 ab      | 0.67 ab   | 0.42 ab     | 5.44 a    | 1.23 a    | 0.15         | 0.20 ab          | 0.11       | 0.16 ab            |
| PP×18                                  | 0.08              | 0.24 b       | 0.81 a    | 0.33 ab     | 4.04 ab   | 0.87 ab   | 0.14         | 0.20 ab          | 0.08       | 0.20 ab            |
| OL×18                                  | 0.08              | 0.21 b       | 0.59 ab   | 0.32 ab     | 3.29 ab   | 0.65 b    | 0.19         | 0.18 ab          | 0.10       | 0.20 ab            |
| <i>In ovo</i> injected substance (IOS) |                   |              |           |             |           |           |              |                  |            |                    |
| NC                                     | 0.04              | 0.35         | 0.11 b    | 0.39        | 2.49      | 0.80      | 0.16         | 0.12 b           | 0.10       | 0.10 b             |
| PC                                     | 0.04              | 0.27         | 0.46 ab   | 0.31        | 3.36      | 0.79      | 0.30         | 0.18 ab          | 0.12       | 0.24 a             |
| SP                                     | 0.06              | 0.31         | 0.71 a    | 0.51        | 3.99      | 0.88      | 0.20         | 0.25 a           | 0.08       | 0.18 ab            |
| PP                                     | 0.06              | 0.29         | 0.70 a    | 0.39        | 3.32      | 0.87      | 0.18         | 0.19 ab          | 0.08       | 0.19 ab            |
| OL                                     | 0.06              | 0.18         | 0.58 a    | 0.42        | 3.09      | 0.81      | 0.22         | 0.19 ab          | 0.09       | 0.22 ab            |
| <i>In ovo</i> injection time (IOT)     |                   |              |           |             |           |           |              |                  |            |                    |
| 10 days                                | 0.04 b            | 0.22         | 0.48      | 0.44        | 2.74 b    | 0.83      | 0.26         | 0.20             | 0.09       | 0.18               |
| 18 days                                | 0.06 a            | 0.34         | 0.54      | 0.37        | 3.76 a    | 0.82      | 0.17         | 0.17             | 0.10       | 0.19               |
| Pooled SEM                             | 0.00              | 0.04         | 0.10      | 0.08        | 0.57      | 0.10      | 0.04         | 0.02             | 0.02       | 0.03               |
| p-value                                |                   |              |           |             |           |           |              |                  |            |                    |
| IOS                                    | 0.482             | 0.108        | 0.021     | 0.077       | 0.101     | 0.321     | 0.129        | 0.027            | 0.141      | 0.041              |
| IOT                                    | 0.032             | 0.079        | 0.114     | 0.238       | 0.044     | 0.111     | 0.082        | 0.094            | 0.136      | 0.748              |
| IOS×IOT                                | 0.203             | 0.044        | 0.043     | 0.030       | 0.026     | 0.025     | 0.471        | 0.030            | 0.098      | 0.023              |

NC, PC, SP, PP, and OL - negative control, positive control, and *in ovo* injection of sweet orange peel, pomegranate peel, and olive leaf, respectively, on day 10 (×10) and day 18 (×18) of incubation; SEM - standard error of the mean; a, b, - means within a column with different letters differ significantly ( $p \leq 0.05$ ).
